# Supplementary material for: Butterfly Assemblages Differ among Vegetation Types in Southern Amazonia
Source: MDPI journal article supplement (doi:10.3390/d15050624), 2023-05-04
Supplement: s1 [file s1]

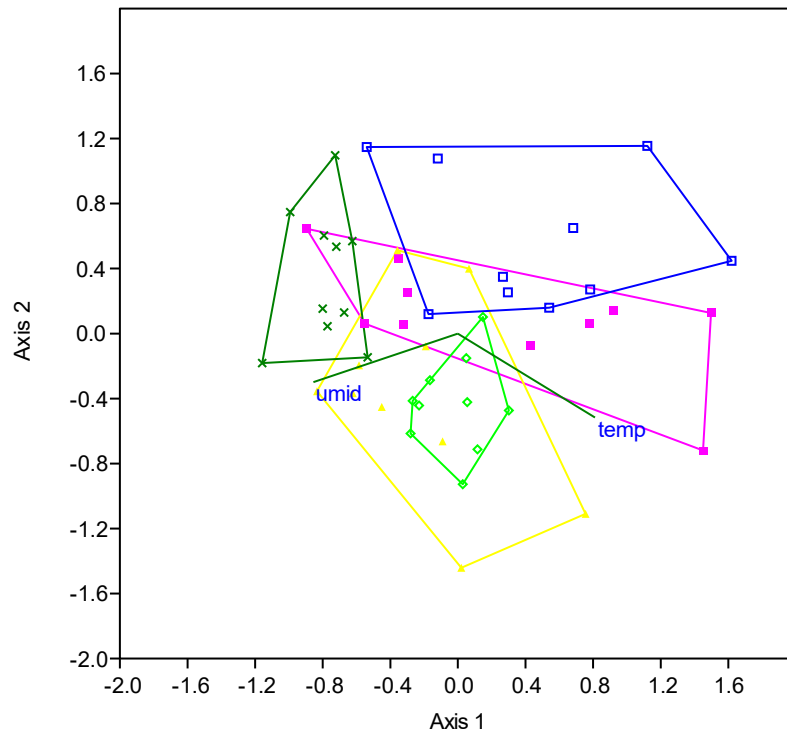

**Figure S1.** Canonical ordination of sampling plots of five vegetation types at Cristalino Lodge (Alta Floresta, Mato Grosso, Brazil), Southern Amazonia, in a gradient of humidity (umid) and temperature (temp). Pink squares: *bamboo forest*; yellow triangles: *forest gap*; dark green crosses: *terra firme*; blue squares: *igapó*; light green diamonds: *semi-deciduous forest*.
